# Supplementary material for: Adapting Rapid Diagnostic Tests to Detect Historical Dengue Virus Infections
Source: PubMed Central journal article supplement (PMC8344047; doi:10.3389/fimmu.2021.703887), 2021-07-23
Supplement: DataSheet_1.pdf [file DataSheet_1.pdf]

**Table S2. Sensitivity and specificity values at each timepoint EcoDess Cohort, SD BIOLINE Dengue IgG/IgM RDT (estimate and 95% confidence intervals).**

| <b>Timepoint</b>                                       | <b>0.25 hrs</b> | <b>0.5 hrs</b>  | <b>0.75 hrs</b> | <b>1 hr</b>     | <b>1.5 hrs</b>  | <b>2 hrs</b>    | <b>3 hrs</b>    |
|--------------------------------------------------------|-----------------|-----------------|-----------------|-----------------|-----------------|-----------------|-----------------|
| <b>All DENV+ samples</b>                               |                 |                 |                 |                 |                 |                 |                 |
| Qualitative Sensitivity                                | 41<br>(28-56)   | 70<br>(53-82)   | 80<br>(66-89)   | 96<br>(85-99)   | 97<br>(87-100)  | 95<br>(85-99)   | 98<br>(88-100)  |
| Qualitative Specificity                                | 100<br>(87-100) | 100<br>(84-100) | 96<br>(79-100)  | 80<br>(61-91)   | 88<br>(66-98)   | 76<br>(57-89)   | 36<br>(20-55)   |
| Quantitative Sensitivity at Optimal (≥98%) Specificity | 57<br>(42-70)   | 31<br>(64-98)   | 57<br>(42-70)   | 16<br>(10-50)   | 62<br>(46-75)   | 36<br>(24-51)   | 52<br>(38-66)   |
| Optimal (≥98%) Quantitative Specificity                | 100<br>(87-100) | 100<br>(84-100) | 100<br>(86-100) | 100<br>(87-100) | 100<br>(82-100) | 100<br>(87-100) | 100<br>(87-100) |
| Quantitative Sensitivity at Minimum (≥90%) Specificity | 70<br>(56-82)   | 61<br>(45-75)   | 64<br>(49-76)   | 55<br>(40-68)   | 69<br>(54-81)   | 75<br>(61-85)   | 86<br>(73-94)   |
| Minimum (≥90%) Quantitative Specificity                | 92<br>(75-99)   | 90<br>(70-98)   | 91<br>(73-98)   | 92<br>(75-99)   | 94<br>(73-100)  | 92<br>(75-99)   | 92<br>(75-99)   |
| <b>Only DENV+ primary samples</b>                      |                 |                 |                 |                 |                 |                 |                 |
| Qualitative Sensitivity                                | 16<br>(6-38)    | 44<br>(23-67)   | 53<br>(32-73)   | 79<br>(57-91)   | 83<br>(61-94)   | 95<br>(75-100)  | 95<br>(75-100)  |
| Qualitative Specificity                                | 100<br>(87-100) | 100<br>(84-100) | 100<br>(86-100) | 92<br>(75-99)   | 88<br>(66-98)   | 80<br>(61-91)   | 40<br>(23-59)   |

**Table S3. Sensitivity and specificity values at each timepoint for the Nicaragua Cohort samples evaluated using the Excivion Dengue RDT (estimate and 95% confidence intervals are shown).**

| <b>Timepoint</b>                                                | <b>0.5 hrs</b>  | <b>0.75 hrs</b> | <b>1 hr</b>     |
|-----------------------------------------------------------------|-----------------|-----------------|-----------------|
| <b>All DENV+ samples</b>                                        |                 |                 |                 |
| Qualitative Sensitivity                                         | 79<br>(62-89)   | Not collected   | Not collected   |
| Qualitative Specificity                                         | 79<br>(57-92)   | Not collected   | Not collected   |
| Quantitative Sensitivity at Optimal ( $\geq 98\%$ ) Specificity | 49<br>(33-65)   | 52<br>(32-72)   | 75<br>(51-90)   |
| Optimal ( $\geq 98\%$ ) Quantitative Specificity                | 100<br>(83-100) | 100<br>(80-100) | 100<br>(72-100) |
| Quantitative Sensitivity at Minimum ( $\geq 90\%$ ) Specificity | 64<br>(47-78)   | 62<br>(41-79)   | 81<br>(57-93)   |
| Minimum ( $\geq 90\%$ ) Quantitative Specificity                | 95<br>(75-100)  | 93<br>(70-100)  | 90<br>(60-100)  |
| <b>Only DENV+ primary samples</b>                               |                 |                 |                 |
| Qualitative Sensitivity                                         | 67<br>(44-84)   | Not collected   | Not collected   |
| Qualitative Specificity                                         | 79<br>(57-91)   | Not collected   | Not collected   |

**Table S4. Sensitivity and specificity values at each timepoint for the Nicaragua Cohort samples evaluated using the Excivion Zika RDT (estimates and 95% confidence intervals are shown).**

| <b>Timepoint</b>                                                | <b>0.5 hrs</b>  | <b>0.75 hrs</b> | <b>1 hr</b>     |
|-----------------------------------------------------------------|-----------------|-----------------|-----------------|
| Qualitative Sensitivity                                         | 100<br>(89-100) | Not collected   | Not collected   |
| Qualitative Specificity                                         | 70<br>(40-89)   | Not collected   | Not collected   |
| Quantitative Sensitivity at Optimal ( $\geq 98\%$ ) Specificity | 93<br>(79-99)   | 97<br>(83-100)  | 100<br>(89-100) |
| Optimal ( $\geq 98\%$ ) Quantitative Specificity                | 100<br>(72-100) | 100<br>(72-100) | 100<br>(72-100) |
| Quantitative Sensitivity at Minimum ( $\geq 90\%$ ) Specificity | 100<br>(89-100) | 100<br>(89-100) | 100<br>(89-100) |
| Minimum ( $\geq 90\%$ ) Quantitative Specificity                | 90<br>(60-100)  | 90<br>(60-100)  | 90<br>(60-100)  |
